# Supplementary material for: Active Components of Commonly Prescribed Medicines Affect Influenza A Virus–Host Cell Interaction: A Pilot Study
Source: MDPI journal article supplement (doi:10.3390/v13081537), 2021-08-03
Supplement: s1 [file s1]

**Table S1.** Active compounds of selected drugs, their suppliers and catalogue numbers.

| Drug                          | CAS          | MW   | Formula                                                                           | Cat N             | Pur., %      | Supplier                    |
|-------------------------------|--------------|------|-----------------------------------------------------------------------------------|-------------------|--------------|-----------------------------|
| 17 $\alpha$ -Ethinylestradiol | 57-63-6      | 296  | C <sub>20</sub> H <sub>24</sub> O <sub>2</sub>                                    | E4876-100MG       | ≥98          | Sigma Aldrich               |
| 4-Acetamidophenol             | 103-90-2     | 151  | C <sub>8</sub> H <sub>9</sub> NO <sub>2</sub>                                     | 102330050         | 98           | Acros Organics              |
| Acetylsalicylic acid          | 50-78-2      | 180  | C <sub>9</sub> H <sub>8</sub> O <sub>4</sub>                                      | AC158180500       | 99           | Acros Organics              |
| Amlodipine                    | 88150-42-9   | 409  | C <sub>26</sub> H <sub>31</sub> ClN <sub>2</sub> O <sub>8</sub> S                 | CAYM14838         | ≥98          | Cayman Chemicals            |
| Atorvastatin                  | 134523-03-8  | 559  | C <sub>33</sub> H <sub>35</sub> FN <sub>2</sub> O <sub>5</sub>                    | CAYM10493         | ≥98          | Cayman Chemicals            |
| Bumetanide                    | 28395-03-1   | 364  | C <sub>17</sub> H <sub>20</sub> N <sub>2</sub> O <sub>5</sub> S                   | CAYM14630         | ≥98          | Cayman Chemicals            |
| Candesartan                   | 139481-59-7  | 440  | C <sub>24</sub> H <sub>20</sub> N <sub>6</sub> O <sub>3</sub>                     | sc-217825         | ≥98          | Santa Cruz<br>Biotechnology |
| Cetirizin                     | 83881-52-1   | 389  | C <sub>21</sub> H <sub>27</sub> Cl <sub>3</sub> N <sub>2</sub> O <sub>3</sub>     | 89126-50MG        | ≥98          | Sigma Aldrich               |
| Cyanocobalamin                | 68-19-9      | 1355 | C <sub>63</sub> H <sub>88</sub> CoN <sub>14</sub> O <sub>14</sub> P               | DRE-<br>C11798500 |              | LGC Standards               |
| Desloratadine                 | 100643-71-8  | 311  | C <sub>19</sub> H <sub>19</sub> ClN <sub>2</sub>                                  | CAYM16931         | ≥98          | Cayman Chemicals            |
| Desogestrel                   | 54024-22-5   | 310  | C <sub>22</sub> H <sub>30</sub> O                                                 | CAYM23651         | ≥95          | Cayman Chemicals            |
| D-Pantothenic acid            | 79-83-4      | 219  | C <sub>9</sub> H <sub>17</sub> NO <sub>5</sub>                                    | HY-B0430          | ≥98          | MedChemExpress              |
| Drospirenone                  | 67392-87-104 | 367  | C <sub>24</sub> H <sub>30</sub> O <sub>3</sub>                                    | CAYM23347         | ≥98          | Cayman Chemicals            |
| Enalapril                     | 75847-73-3   | 376  | C <sub>20</sub> H <sub>28</sub> N <sub>2</sub> O <sub>5</sub>                     | J60750.03         | ≥97          | Alfa Aesar                  |
| Escitalopram                  | 128196-01-0  | 324  | C <sub>20</sub> H <sub>21</sub> FN <sub>2</sub> O                                 | CAYM22405         | ≥98          | Cayman Chemicals            |
| Esomeprazole                  | 161973-10-0  | 767  | C <sub>34</sub> H <sub>42</sub> MgN <sub>6</sub> O <sub>9</sub> S <sub>2</sub>    | CAYM17326         | ≥95          | Cayman Chemicals            |
| Etonogestrel                  | 54048-10-1   | 324  | C <sub>22</sub> H <sub>28</sub> O <sub>2</sub>                                    | CAYM21062         | ≥98          | Cayman Chemicals            |
| Fluticasone propionate        | 80474-14-2   | 445  | C <sub>25</sub> H <sub>31</sub> F <sub>3</sub> O <sub>5</sub> S                   | 462101000         | ≥96          | Acros Organics              |
| Folic acid                    | 59-30-3      | 441  | C <sub>19</sub> H <sub>19</sub> N <sub>7</sub> O <sub>6</sub>                     | J62937.06         | ≥97          | Alfa Aesar                  |
| Furosemide                    | 54-31-9      | 331  | C <sub>12</sub> H <sub>10</sub> ClN <sub>2</sub> O <sub>5</sub> S                 | 448970010         | ≥97          | Acros Organics              |
| Hydroxocobalamin              | 13422-5 51-0 | 1346 | C <sub>62</sub> H <sub>89</sub> CoN <sub>13</sub> O <sub>15</sub> P               | CAYM24099         | ≥95          | Cayman Chemicals            |
| Drug                          | CAS          | MW   | Formula                                                                           | Cat N             | Purity,<br>% | Supplier                    |
| Insulin aspart                | 116094-23-6  | 5826 | C <sub>256</sub> H <sub>387</sub> N <sub>65</sub> O <sub>79</sub> S <sub>6</sub>  | EPY0000349        |              | LGC Standards               |
| Lercanidipine                 | 132866-11-6  | 612  | C <sub>36</sub> H <sub>41</sub> N <sub>3</sub> O <sub>6</sub>                     | HY-B0612A         | 98.5         | MedChemExpress              |
| Levonorgestrel                | 797-63-7     | 312  | C <sub>21</sub> H <sub>28</sub> O <sub>2</sub>                                    | CAYM10006         | ≥95          | Cayman Chemicals            |
| Levothyroxine                 | 25416-653    | 817  | C <sub>15</sub> H <sub>12</sub> I <sub>4</sub> NNaO <sub>5</sub>                  | FT48192           | ≥97          | Carbosynth                  |
| Losartan                      | 114798-26-4  | 423  | C <sub>22</sub> H <sub>23</sub> ClN <sub>6</sub> O                                | FL39656           | ≥97          | Carbosynth                  |
| Metformin                     | 1115-70-4    | 166  | C <sub>4</sub> H <sub>12</sub> ClN <sub>5</sub>                                   | sc-202000         | ≥99          | Santa Cruz<br>Biotechnology |
| Metoprolol                    | 51384-51-1   | 267  | C <sub>15</sub> H <sub>25</sub> NO <sub>3</sub>                                   | sc-264643         | 97           | Santa Cruz<br>Biotechnology |
| Mometasone furoate            | 83919-23-7   | 521  | C <sub>27</sub> H <sub>30</sub> Cl <sub>2</sub> O <sub>6</sub>                    | CAYM21365         | ≥98          | Cayman Chemicals            |
| Naproxen                      | 22204-53-1   | 230  | C <sub>14</sub> H <sub>14</sub> O <sub>3</sub>                                    | CAYM70290         | ≥99          | Cayman Chemicals            |
| Nicotinic acid                | 59-67-6      | 123  | C <sub>6</sub> H <sub>5</sub> NO <sub>2</sub> /HOOC <sub>5</sub> H <sub>4</sub> N | 128290050         | 99.5         | Acros Organics              |
| Nifedipine                    | 21829-25-4   | 346  | C <sub>17</sub> H <sub>18</sub> N <sub>2</sub> O <sub>6</sub>                     | CAYM11106         | ≥98          | Cayman Chemicals            |
| Pantoprazole                  | 102625-70-7  | 383  | C <sub>16</sub> H <sub>15</sub> F <sub>2</sub> N <sub>3</sub> O <sub>4</sub> S    | CAYM21345         | ≥98          | Cayman Chemicals            |
| Ramipril                      | 87333-19-5   | 417  | C <sub>23</sub> H <sub>32</sub> N <sub>2</sub> O <sub>5</sub>                     | FC27676           | ≥98          | Cymit Quimica               |
| Riboflavin                    | 83-88-5      | 376  | C <sub>17</sub> H <sub>20</sub> N <sub>4</sub> NaO <sub>9</sub> P                 | A11764.14         | 98           | Alfa Aesar                  |
| Salbutamol                    | 18559-94-9   | 239  | C <sub>13</sub> H <sub>21</sub> NO <sub>3</sub>                                   | CAYM21003         | ≥98          | Cayman Chemicals            |
| Salmeterol                    | 89365-50-4   | 416  | C <sub>25</sub> H <sub>37</sub> NO <sub>4</sub>                                   | HY-14302          | 99.7         | MedChemExpress              |
| Sertraline                    | 79559-97-0   | 306  | C <sub>17</sub> H <sub>18</sub> Cl <sub>3</sub> N                                 | 462190010         | ≥98          | Acros Organics              |
| Simvastatin                   | 79902-63-9   | 419  | C <sub>25</sub> H <sub>38</sub> O <sub>5</sub>                                    | 458840010         | 98           | Acros Organics              |
| Tamsulosin                    | 106463-17-6  | 445  | C <sub>20</sub> H <sub>29</sub> ClN <sub>2</sub> O <sub>5</sub> S                 | CAYM24020         | ≥98          | Cayman Chemicals            |

|             |             |     |                |           |     |                             |
|-------------|-------------|-----|----------------|-----------|-----|-----------------------------|
| Thiamine    | 67-03-8     | 337 | HC12H17ON4SCl2 | 148990100 | 99  | Acros Organics              |
| Valsartan   | 137862-53-4 | 436 | C24H29N5O3     | sc-220362 | ≥98 | Santa Cruz<br>Biotechnology |
| Venlafaxine | 99300-78-4  | 277 | C17H27NO2      | HY-B0196A | 98  | MedChemExpress              |
| Vitamin D2  | 50-14-6     | 397 | C28H44O        | CAYM11791 | ≥98 | Cayman Chemicals            |
| Vitamin D3  | 67-97-0     | 385 | C27H44O        | CAYM11792 | ≥98 | Cayman Chemicals            |

2

**Table S2.** The most dispensed medicines in Central Norway in 2019 sorted by daily defined dosage (DDD).

3

| ATC     | Active compounds            | Indications                                                                                | DDD        |
|---------|-----------------------------|--------------------------------------------------------------------------------------------|------------|
| C10AA05 | Atorvastatin                | Hypercholesterolemia                                                                       | 24 480 740 |
| B01AC06 | Acetylsalicylic acid        | Pain, fever or inflammation                                                                | 16 113 802 |
| C08CA01 | Amlodipine                  | Hypertension and coronary artery disease                                                   | 10 990 638 |
| C09CA06 | Candesartan                 | Hypertension                                                                               | 9 404 137  |
| A02BC02 | Pantoprazole                | Erosive esophagitis and Zollinger-Ellison syndrome                                         | 8 626 254  |
| R06AE07 | Cetirizine                  | Hay fever, allergies, angioedema, and urticaria                                            | 8 377 836  |
| C09AA05 | Ramipril                    | Hypertension and congestive heart failure                                                  | 8 034 213  |
| N02BE01 | Paracetamol                 | Pain and fever                                                                             | 7 548 361  |
| C10AA01 | Simvastatin                 | Hypercholesterolemia                                                                       | 7 117 959  |
| H03AA01 | Levothyroxine sodium        | Thyroid hormone deficiency                                                                 | 6 701 185  |
| G03AA07 | Levonorgestrel              | Birth control (in combination with the estrogen ethinylestradiol), emergency birth control | 6 677 552  |
| G03AA07 | Ethinylestradiol            | Birth control and treatment of menopausal symptoms in combination with progestins          | 6 677 552  |
| B03BB01 | Folic acid                  | Folate deficiency                                                                          | 6 598 841  |
| A12AX   | Vitamin D2                  | Vitamin D deficiency                                                                       | 5 675 283  |
| A11CC05 | Vitamin D3 (colecalfiferol) | Vitamin D deficiency                                                                       | 5 332 710  |
| R06AX27 | Desloratadine               | Allergic rhinitis, nasal congestion                                                        | 5 309 712  |
| C07AB02 | Metoprolol                  | Hypertension and coronary artery disease                                                   | 5 264 848  |
| A02BC05 | Esomeprazole                | Gastroesophageal reflux disease, erosive esophagitis, duodenal ulcers                      | 5 152 910  |
| N06AB10 | Escitalopram                | Depression, generalized anxiety disorder                                                   | 4 728 187  |
| A10BA02 | Metformin                   | Type 2 diabetes, polycystic ovary syndrome                                                 | 4 351 201  |
| G03AC08 | Etonogestrel                | Birth control                                                                              | 4 276 000  |
| M01AE52 | Naproxen                    | Pain and fever caused by inflammation                                                      | 4 031 853  |
| C09CA03 | Valsartan                   | Hypertension and congestive heart failure                                                  | 3 514 084  |
| C09CA01 | Losartan                    | Hypertension                                                                               | 3 491 802  |
| G03AC09 | Desogestrel                 | Birth control and menopausal symptoms                                                      | 3 301 519  |
| B03BA03 | Hydroxocobalamin            | Vitamin B12 deficiency                                                                     | 3 182 950  |
| R03AC02 | Salbutamol                  | Asthma                                                                                     | 3 018 486  |
| A11E    | D-Pantothenic acid*         | Vitamin B deficiency                                                                       | 2 872 185  |

|                        |                        |                                                                      |           |
|------------------------|------------------------|----------------------------------------------------------------------|-----------|
| A11E                   | Thiamine*              | Vitamin B deficiency                                                 | 2 872 185 |
| A11E                   | Riboflavin*            | Vitamin B deficiency                                                 | 2 872 185 |
| A11E                   | Nicotinic acid*        | Vitamin B deficiency                                                 | 2 872 185 |
| C03CA01                | Furosemide             | Hypertension and edema                                               | 2 864 836 |
| R03AK06                | Fluticasone propionate | Asthma, allergic rhinitis, atopic dermatitis                         | 2 668 274 |
| C08CA13                | Lercanidipine          | Hypertension                                                         | 2 667 274 |
| B03BA01                | Cyanocobalamin         | Vitamin B12 deficiency                                               | 2 406 614 |
| C03CA02                | Bumetanide             | Heart failure                                                        | 2 354 487 |
| N06AB06                | Sertraline             | Depression                                                           | 2 129 315 |
| A10AB05 and<br>A10AD05 | Insulin aspart         | Diabetes mellitus type 1 and 2                                       | 2 101 161 |
| G04CA02                | Tamsulosin             | Benign prostatic hyperplasia, kidney stones, acute urinary retention | 2 065 873 |
| R01AD09                | Mometasone furoate     | Symptoms in nose caused by allergy or polyps                         | 1 968 160 |
| N06AX16                | Venlafaxine            | Depression, general anxiety disorder                                 | 1 840 761 |
| R03AK06                | Salmeterol             | Asthma                                                               | 1 833 358 |
| C08CA05                | Nifedipine             | Hypertension and angina pectoris                                     | 1 773 040 |
| C09AA02                | Enalapril              | Hypertension, diabetic kidney disease and heart failure              | 1 770 279 |
| G03AA12                | Drospirenone           | Birth control and menopausal symptoms                                | 1 725 864 |

\* B-Tonin, TroBe and nycoplus B-kompleks include d-pantothenic acid (vitamin B5), thiamine (vitamin B1), riboflavin (vitamin B2) or nicotinic acid (vitamin B3).

4

5
